# Supplementary material for: Invasive Plant Species Distribution Is Structured by Soil and Habitat Type in the City Landscape
Source: MDPI journal article supplement (doi:10.3390/plants10040773), 2021-04-15
Supplement: s1 [file s1]

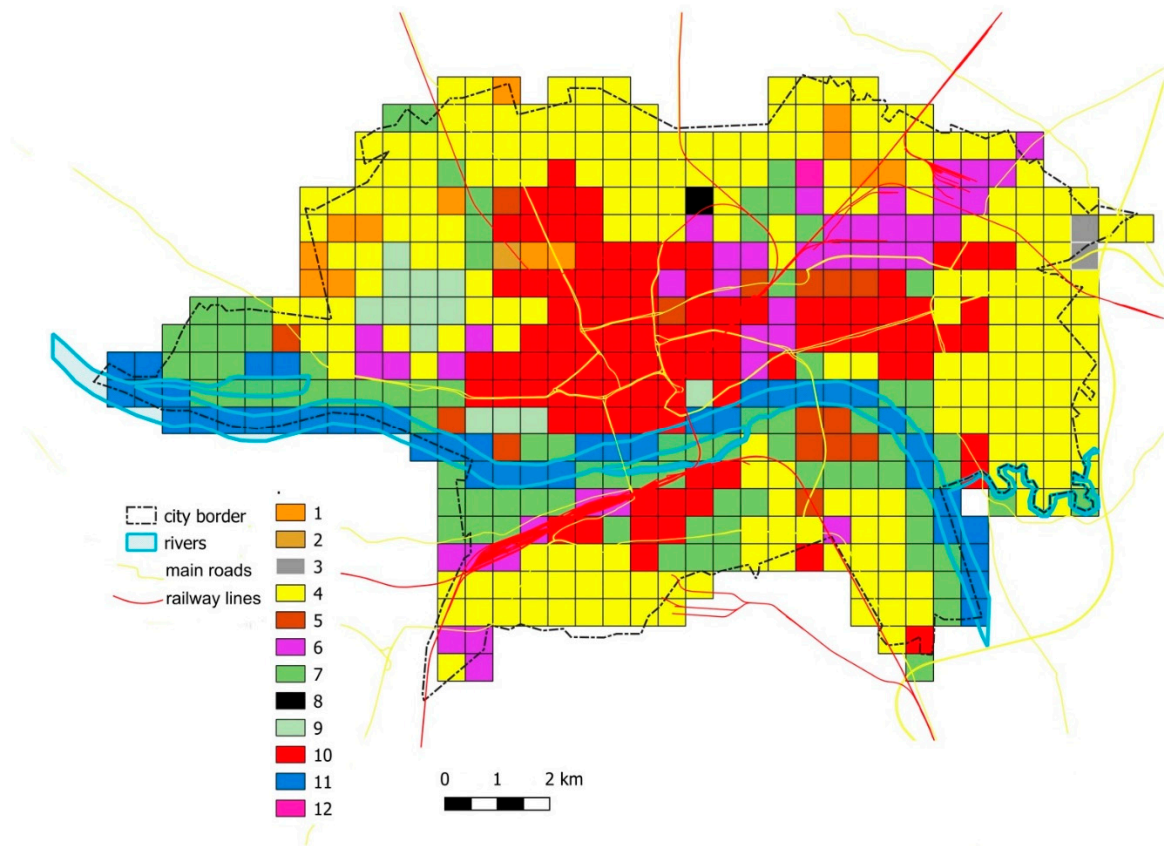

**Figure S1.** Choropleth map of natural and anthropogenic soil types in the city of Toruń (according to: [79]): 1—podzols, 2—gleyic podzols, 3—mucky soils, 4—rusty soils, 5—hortisols, 6—industriosols, 7—alluvial soils, 8—necrosols, 9—replantosols, 10—urbisols, 11—surface water, 12—garbage dump.

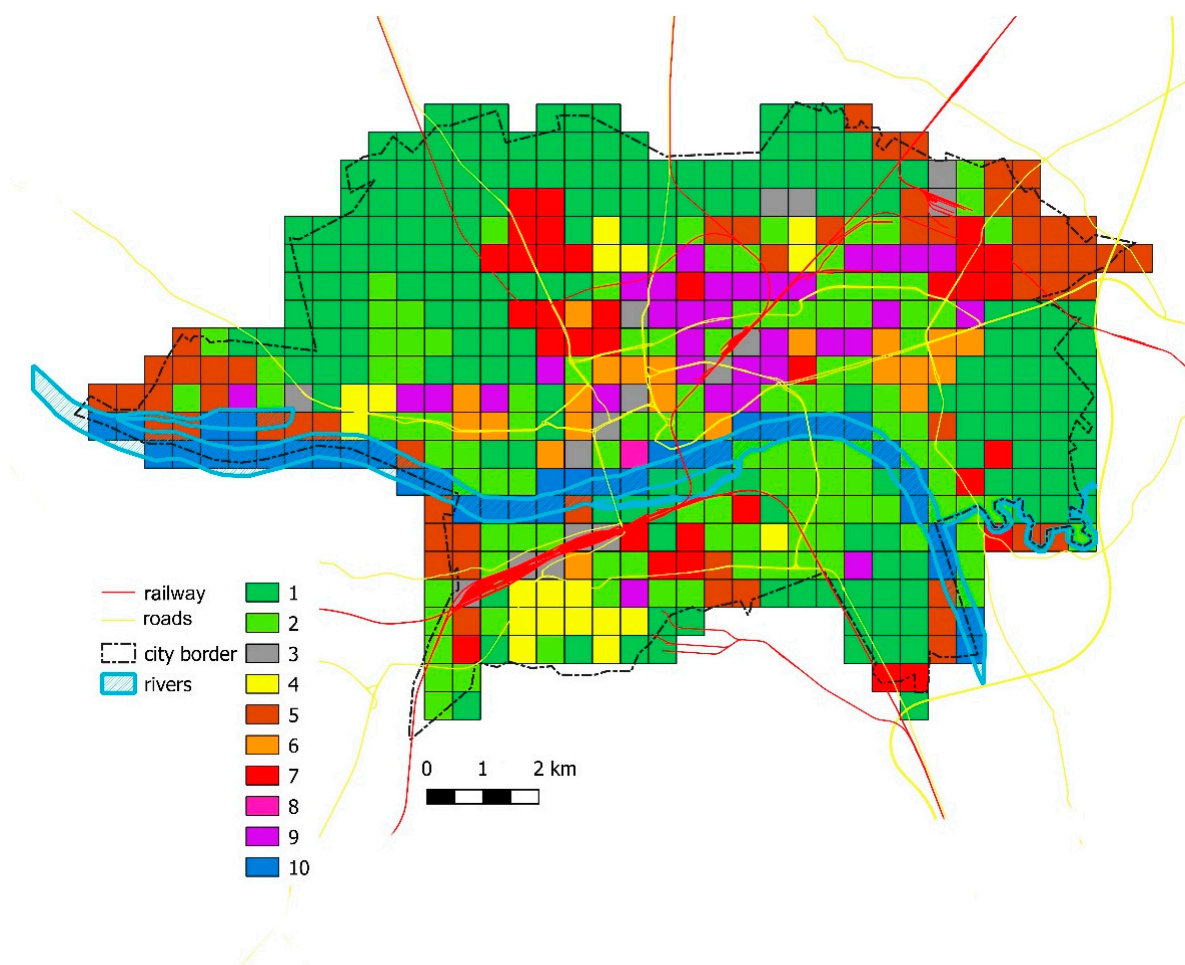

**Figure S2.** Choropleth map of habitat types in the city of Toruń: 1—forests, 2—shrubs, grasslands, allotment gardens, 3—ruderal areas, 4—sandy and gravel areas, 5—arable fields, 6—multifamily housing, 7—individual housing, 8—tenements, 9—industrial areas, 10 – surface water (according to: Mieczysław Kunz, Department of Geomatics and Cartography, Faculty of Earth Sciences and Spatial Management NCU in Toruń) [78].



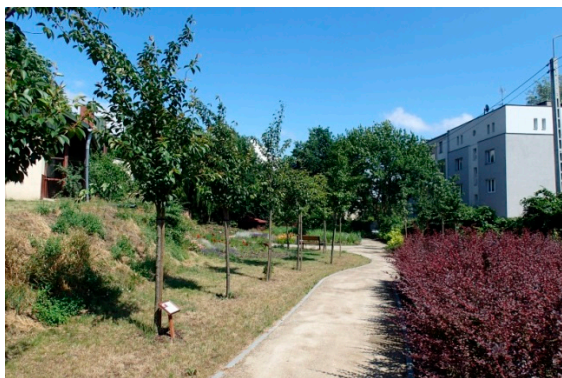

Multi-family housing area (Mh)

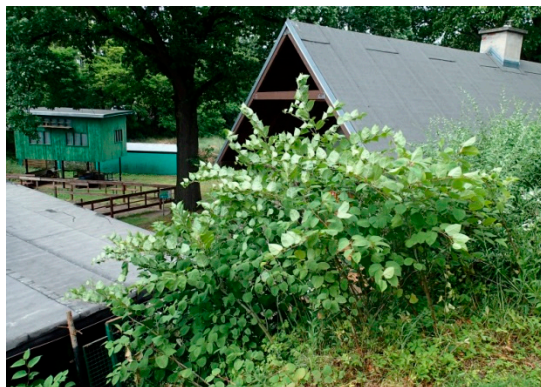

Individual housing area (Ih)

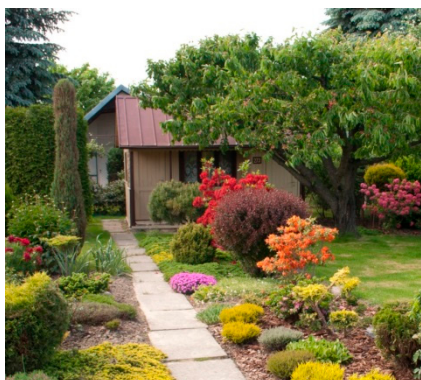

Allotment garden (Ag)

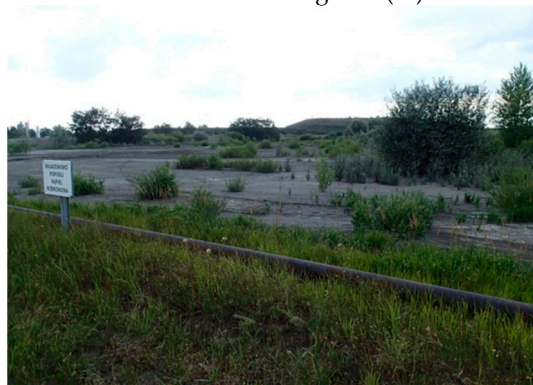

Industrial areas –landfill with mixture of ash and slag in Power Plants (Ia)

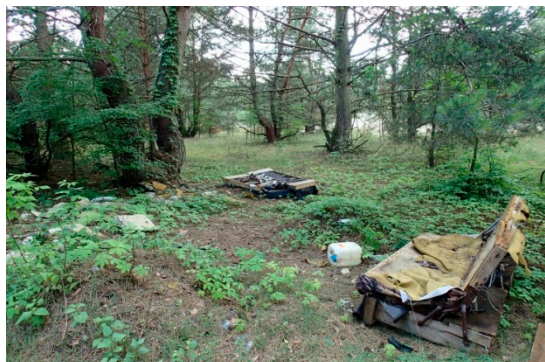

Ruderal area (Ra)

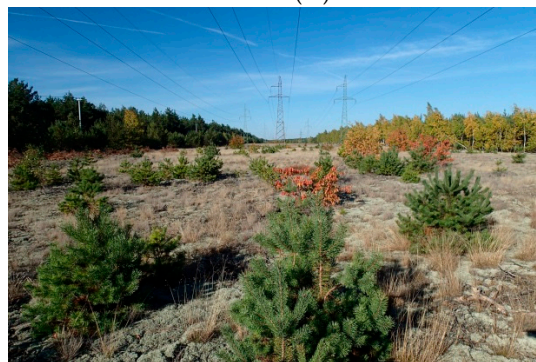

Sandy area (SaGr)

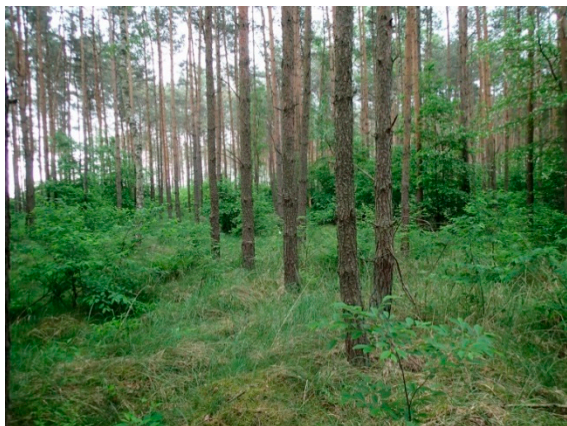

Forest (Fo)

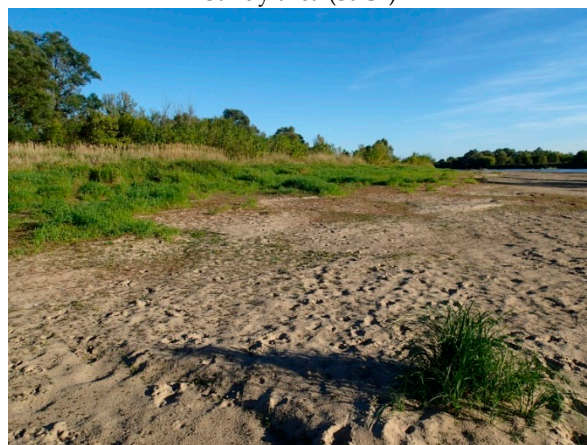

River bank area (Sw, As)

**Figure S3.** Selected habitat types within the borders of the city of Toruń.

**Table S1.** Invasive plant species recorded in the city of Toruń, Poland. Species identified as invasive according to: Tokarska-Guzik et al. [1]; species name given according to: World Flora Online [77].

| Species Name                                                                      | Abbreviation of Species Name | Origin                  | First Time Recorded | Frequency [%] |
|-----------------------------------------------------------------------------------|------------------------------|-------------------------|---------------------|---------------|
| Species with full ATPOL location (included in statistical analyzes)               |                              |                         |                     |               |
| <i>Acer negundo</i> L.                                                            | Ace.neg                      | North America           | 1808                | 97.3          |
| <i>Ailanthus altissima</i> (Mill.) Swingle                                        | Ail.alt                      | Asia E                  | 1808                | 0.8           |
| <i>Ambrosia artemisiifolia</i> L.                                                 | Amb.art                      | North America           | 1613                | 0.4           |
| <i>Asclepias syriaca</i> L.                                                       | Asc.syr                      | North America           | 18th century        | 1.6           |
| <i>Bidens frondosa</i> L.                                                         | Bid.fro                      | North America           | 1777                | 27.1          |
| <i>Bunias orientalis</i> L.                                                       | Bun.ori                      | Europe SE, Asia W       | 1858                | 1.2           |
| <i>Cannabis sativa</i> L. ( <i>Cannabis sativa</i> var. <i>spontanea</i> Vavilov) | Can.sat                      | Asia                    | 20th century        | 59.1          |
| <i>Celtis occidentalis</i> L.                                                     | Cel.occ                      | North America           | 1805                | 0.6           |
| <i>Clematis vitalba</i> L.                                                        | Cle.vit                      | Europe WS, Asia, Africa | 1613                | 0.8           |
| <i>Erigeron canadensis</i> L.                                                     | Eri.can                      | North America           | 1730                | 98.4          |
| <i>Echinocystis lobata</i> (Michx.) Torr. & A. Gray                               | Ech.lob                      | North America           | 1937                | 27.3          |
| <i>Elodea canadensis</i> Michx.                                                   | Elo.can                      | North America           | 1867                | 18.2          |
| <i>Elodea nuttallii</i> (Planch.) H.St.John                                       | Elo.nut                      | North America           | 1990                | 5.4           |
| <i>Eragrostis multicaulis</i> Steud.                                              | Era.mul                      | Europe SE, Asia W       | 20th century        | 14.1          |
| <i>Erechtites hieracifolia</i> (L.) Raf.                                          | Ere.hie                      | North America           | 1902                | 1.2           |
| <i>Fraxinus pennsylvanica</i> Marshall                                            | Fra.pen                      | North America           | 1805                | 2.5           |
| <i>Galinsoga parviflora</i> Cav.                                                  | Gal.par                      | Central & South America | 1807                | 82.6          |
| <i>Helianthus tuberosus</i> L.                                                    | Hel.tub                      | North America           | 1730                | 38.4          |
| <i>Impatiens glandulifera</i> Royle                                               | Imp.gla                      | Central Asia            | 1890                | 2.9           |
| <i>Impatiens parviflora</i> DC.                                                   | Imp.par                      | Central & Eastern Asia  | 1850                | 7.9           |
| <i>Juglans regia</i> L.                                                           | Jug.reg                      | Asia SE, E              | 18th century        | 36.0          |
| <i>Lycium barbarum</i> L.                                                         | Lyc.bar                      | Europe SE, Asia E       | 1847                | 50.0          |
| <i>Prunus serotina</i> Ehrh.                                                      | Pru.ser                      | Central & North America | 1813                | 72.7          |
| <i>Parthenocissus inserta</i> (A.Kern.) Fritsch                                   | Par.ins                      | North America           | 1806                | 49.2          |
| <i>Quercus rubra</i> L.                                                           | Que.rub                      | North America           | 1806                | 39.7          |
| <i>Reynoutria japonica</i> Houtt.                                                 | Rey.jap                      | Asia E                  | 1882                | 2.3           |
| <i>Reynoutria sachalinensis</i> (F. Schmidt) Nakai                                | Rey.sac                      | Asia E                  | 1903                | 0.4           |
| <i>Robinia pseudoacacia</i> L.                                                    | Rob.pse                      | North America           | 18th century        | 85.1          |
| <i>Rumex confertus</i> Willd.                                                     | Rum.con                      | Europe SE, Asia W       | 1873                | 34.5          |
| <i>Solidago gigantea</i> Aiton                                                    | Sol.gig                      | North America           | 1853                | 79.5          |
| <i>Xanthium albinum</i> (Widd.) Scholz & Sukopp                                   | Xan.alb                      | North America           | 1853                | 18.4          |
| Species without full ATPOL location (excluded from statistical analyzes)          |                              |                         |                     |               |
| Species name                                                                      | Origin                       |                         | First time recorded |               |
| <i>Alopecurus myosuroides</i> Huds.                                               | Mediterranean, Asia SW       |                         | no data             |               |
| <i>Amaranthus retroflexus</i> L.                                                  | Central & North America      |                         | 1801                |               |
| <i>Amelanchier spicata</i> (Lam.) K.Koch                                          | North America                |                         | 1820                |               |
| <i>Avena fatua</i> L. s.l.                                                        | Asia SW                      |                         | no data             |               |
| <i>Bromus carinatus</i> Hook. & Arn.                                              | North America                |                         | 1911                |               |
| <i>Buddleja davidii</i> Franch.                                                   | Asia                         |                         | 1911                |               |
| <i>Cornus sericea</i> L.                                                          | North America                |                         | 1811                |               |
| <i>Cotoneaster lucidus</i> Schltdl.                                               | Asia E                       |                         | 1889                |               |
| <i>Digitalis purpurea</i> L.                                                      | Europe W                     |                         | 1809                |               |
| <i>Diploaxis muralis</i> (L.) DC.                                                 | Europe SW                    |                         | 1850                |               |
| <i>Echinochloa crus-galli</i> (L.) P.Beauv.                                       | Asia                         |                         | no data             |               |
| <i>Epilobium ciliatum</i> Raf.                                                    | North America                |                         | 1917                |               |
| <i>Erigeron annuus</i> (L.) Pers.                                                 | North America                |                         | 1830                |               |
| <i>Galinsoga quadriradiata</i> Ruiz & Pav.                                        | America Central & South      |                         | 1876                |               |

|                                                                        |                                      |              |
|------------------------------------------------------------------------|--------------------------------------|--------------|
| <i>Heliopsis helianthoides</i> subsp. <i>scabra</i> (Dunal) T.R.Fisher | North America                        | 19th century |
| <i>Heracleum mantegazzianum</i> Sommier et Levier                      | Kaukaz                               | 1973         |
| <i>Heracleum sosnowskyi</i> Manden.                                    | Kaukaz                               | 1980         |
| <i>Hordeum murinum</i> L.                                              | Europe, Asia                         | no data      |
| <i>Juncus tenuis</i> Willd.                                            | North America                        | 1862         |
| <i>Lolium multiflorum</i> Lam.                                         | Europe SE, Asia SW, Africa N         | 1837         |
| <i>Lupinus polyphyllus</i> Lindl.                                      | North America                        | 1877         |
| <i>Lysimachia punctata</i> L.                                          | Europe SE                            | 1870         |
| <i>Berberis aquifolium</i> Pursh                                       | North America                        | 1839         |
| <i>Oxalis corniculata</i> L.                                           | Europe S, Asia SW, Africa, Australia | 1863         |
| <i>Oxalis stricta</i> L.                                               | North America                        | 1809         |
| <i>Rhus typhina</i> L.                                                 | North America                        | 1806         |
| <i>Rosa rugosa</i> Thunb.                                              | Asia E                               | 19th century |
| <i>Rudbeckia laciniata</i> L.                                          | North America                        | 1787         |
| <i>Setaria pumila</i> (Poir.) Roem et Schult.                          | Asia SE                              | no data      |
| <i>Setaria viridis</i> (L.) P.Beauv.                                   | Asia SE, Mediterranean               | no data      |
| <i>Solidago canadensis</i> L.                                          | North America                        | 1872         |
| <i>Symphotrichum novi-belgii</i> (L.) G.L.Nesom                        | North America                        | 18th century |
| <i>Symphotrichum</i> × <i>salignum</i> (Willd.) G.L.Nesom              | North America                        | 19th century |
| <i>Veronica persica</i> Poir.                                          | Asia SW                              | 1862         |
| <i>Vicia grandiflora</i> Scop.                                         | Europe S, Asia SW                    | 1907         |

First time recorded—first time recorded in Poland; Frequency in permanent plots.
